# Supplementary material for: Electrocatalytic hydrogen evolution using the MS2@MoS2/rGO (M = Fe or Ni) hybrid catalyst
Source: Royal Society of Chemistry journal article supplement (doi:10.1039/c6cc06180j), 2016-01-01
Supplement: c6cc06180j1.pdf [file c6cc06180j1.pdf]

*Supplementary Information*

**Electrocatalysis hydrogen evolution using  $MS_2@MoS_2/RGO$   
(M=Fe or Ni) hybrid catalyst**

Yaxiao Guo,<sup>a,b</sup> Changshuai Shang,<sup>a,b</sup> Xiaoyan Zhang<sup>a,b</sup> and Erkang Wang<sup>a\*</sup>

<sup>a</sup> State Key Laboratory of Electroanalytical Chemistry, Changchun Institute of Applied Chemistry, Chinese Academy of Sciences, 5625 Renmin Street, Changchun, Jilin 130022, China. E-mail: ekwang@ciac.ac.cn

<sup>b</sup> University of Chinese Academy of Sciences, 19A Yuquan Road, Beijing, 100049, China.

## Experimental Section

### Materials and Reagents

Ferrous chloride tetrahydrate, nickel nitrate hexahydrate, phosphomolybdic acid hydrate (PMA), L-cysteine, nafion solution (5 wt%) and graphite rod (99.9995%) were purchased from Sigma-Aldrich. Absolute ethanol, sulphuric acid ( $\text{H}_2\text{SO}_4$ , 95.0-98.0%), hydrochloric acid ( $\text{HCl}$ , 36.0-38.0%), hydrogen peroxide ( $\text{H}_2\text{O}_2$ , 30.0%), potassium persulfate ( $\text{K}_2\text{S}_2\text{O}_8$ ), phosphorus pentoxide ( $\text{P}_2\text{O}_5$ ), sodium nitrate ( $\text{NaNO}_3$ ) and potassium permanganate ( $\text{KMnO}_4$ ) were obtained from Beijing Chemical Co. (China). The ultra-pure water was prepared by the Millipore Milli-Q water purification system (18.2 M $\Omega$ ). All reagents were used directly without further purification.

### Materials synthesis

**Synthesis of Graphene Oxide (GO).** GO was made by a modified Hummers method.<sup>1</sup> The detailed procedure was described as follows. (1) **Preoxidation:** To a stirred solution of concentrated  $\text{H}_2\text{SO}_4$  (15 mL) were added  $\text{K}_2\text{S}_2\text{O}_8$  (5 g) and  $\text{P}_2\text{O}_5$  (5 g) in turn. Then the solution was heated to 80 °C before graphite (1 g) was added. The resulting mixture was stirred for 6 h at 80 °C and cooled to room temperature by injecting 100 mL ultra-pure water. Subsequently, the suspension was centrifuged and rinsed with a large amount of ultra-pure water repeatedly until the pH reached ~ 7. At last, the residue was dried at vacuum to obtain the product of preoxidation. (2) **Peroxidation:** In a three-neck round bottom flask was added concentrated  $\text{H}_2\text{SO}_4$  (23 mL) and cooled to 0 °C using an ice salt bath before the product of preoxidation and  $\text{NaNO}_3$  (0.5 g) were added. Then  $\text{KMnO}_4$  (3 g) was slowly added to the flask and the resulting solution was stirred at 35 °C for 2 h. Water (46 mL) was added and the mixture was heated to 85 °C and stirred at this temperature for 15 minutes. Afterwards, water (140 mL) and 30%  $\text{H}_2\text{O}_2$  (10 mL) were added into the flask to terminate the reaction. The suspension was centrifuged before the residue was washed with 5%  $\text{HCl}$  solution twice and further rinsed with a large amount of water repeatedly. Then the residue was dispersed in 500 mL of water and dialysed for 7 days. Finally, GO was obtained by centrifuging and drying under vacuum.

**Preparation of  $\text{MS}_2@\text{MoS}_2/\text{rGO}$  (M = Fe or Ni) hybrid.** The fabrication process for the  $\text{MS}_2@\text{MoS}_2/\text{rGO}$  (M = Fe or Ni) hybrid is illustrated in Scheme 1. Firstly, 0.15 mM PMA was dissolved into 22.5 ml GO solution (1 mg/ml) with stirring at room temperature for 30 min. Then, L-cysteine (S:Mo=4:1) was dissolved into and stirred for 30 minutes. Finally Fe or Ni precursor (M:Mo=1:1, M=Fe or Ni) were dissolved into. The mixture was stirred at room temperature until a homogeneous solution was achieved before transferred to a 30 mL Teflon-lined autoclave. It was heated in an oven at 200°C for 12 h with no intentional control of ramping or cooling rate. The final product was collected by centrifugation at 10000 rpm for 10 min, and

washed with ultra-pure water and absolute ethanol for several times to remove any possible ions. Finally, product was frozen by liquid nitrogen and lyophilized for 24 h. MoS<sub>2</sub>/rGO was prepared with the same procedure in the absence of Fe (or Ni) precursor. MoS<sub>2</sub> was prepared in the absence of GO and Fe (or Ni) precursor.

## Characterizations

The morphology of different materials is observed with scanning electron microscopy (SEM, PHILIPS XL-30 ESEM) operated at the accelerating voltage of 20 kV. Transmission electron microscopy (TEM), high-resolution TEM (HRTEM), high-angle annular dark field (HAADF)-scanning transmission electron microscopy (STEM), and STEM-energy dispersive X-ray (EDX) mapping were taken by using a JEM-2010 (HR) microscope operated at an accelerating voltage 200 kV. The X-ray diffraction (XRD) patterns of samples were recorded on a Bruker D8 ADVANCE instrument with Cu K $\alpha$  radiation (40 kV, 40 mA). The X-ray photoelectron spectroscopy (XPS) was collected by a Thermo ESCALAB 250 with Al K $\alpha$  radiation (pass energy, 20.0 eV; energy step size, 1.0 eV; total acq. time: 1 min 0.1 s). Raman spectra are measured and collected using Renishaw RM-1000 with a laser excitation of 514.5 nm. The Nyquist plots (EIS) were performed on Zahner Zennium. All electrochemical measurements were performed on CHI620a.

## Electrochemical Measurements

The electrochemical experiments for HER were carried out with an electrochemical workstation (CHI620a) at room temperature using a three-electrode configuration with the glassy carbon electrode with various samples, Ag/AgCl (saturated KCl) electrode and a graphite rod as working electrode, reference electrode and counter electrode, respectively. The preparation of the working electrode is similar to the reference.<sup>2</sup> Typically, 4 mg of sample and 30  $\mu$ L Nafion solution (5 wt%) were dispersed in 1 mL water-ethanol solution with volume ratio of 3:1 by sonicating to form a homogeneous ink. Then 5  $\mu$ L of the dispersion (containing 20  $\mu$ g of catalyst) was loaded onto a glassy carbon electrode of 3 mm diameter (loading ca. 0.285 mg cm<sup>-2</sup>). For comparison, we also performed measurements using a commercial Pt catalyst (20 wt% Pt on Vulcan carbon black) exhibiting high HER catalytic performance. The polarization curves were obtained in 0.5 M H<sub>2</sub>SO<sub>4</sub> (sparged with pure N<sub>2</sub>) with a scan rate of 5 mV s<sup>-1</sup> at room temperature. All of the potentials were iR-compensated and converted to a reversible hydrogen electrode (RHE) scale via calibration according to the literature.<sup>3</sup> In 0.5 M H<sub>2</sub>SO<sub>4</sub>,  $E_{\text{RHE}} = E_{\text{Ag/AgCl}} + 0.217 \text{ V}$ . All the potentials reported in our manuscript were against RHE. And the presented current density was normalized to the geometric surface area. All the polarization curves are the steady-state ones after several cycles.

The ohmic resistance used for iR-compensated was obtained from electrochemical impedance spectroscopy (EIS) measurements with frequencies ranging from 100 mHz

to 1M Hz with an AC voltage of 5 mV. The impedance data were fitted to a simplified Randles circuit to extract the series resistances ( $R_s$ ) and charge-transfer resistances ( $R_{ct}$ ).

The electrochemical stability of different catalysts was evaluated by CV from +0.10 V to -0.4V vs. RHE with a scan rate of 50 mV s<sup>-1</sup>, cycling the electrode 1000 times. Amperometric i-t curve was also obtained at a constant potential of -0.15 V vs. RHE to evaluate the stability.

The electrochemical double layer capacitances ( $C_{dl}$ ) were measured to evaluate the effective surface area of various catalysts. A potential range of 0.1-0.2 V vs. RHE is selected for the capacitance measurements. This is due to the fact that no obvious Faradic current was observed in this region for each catalyst. The capacitive currents of  $\Delta j_{0.15V}/2$  are plotted as a function of the CV scan rate of 20-200 mV s<sup>-1</sup>. The slope of the line fitted by these data is the geometric  $C_{dl}$ .

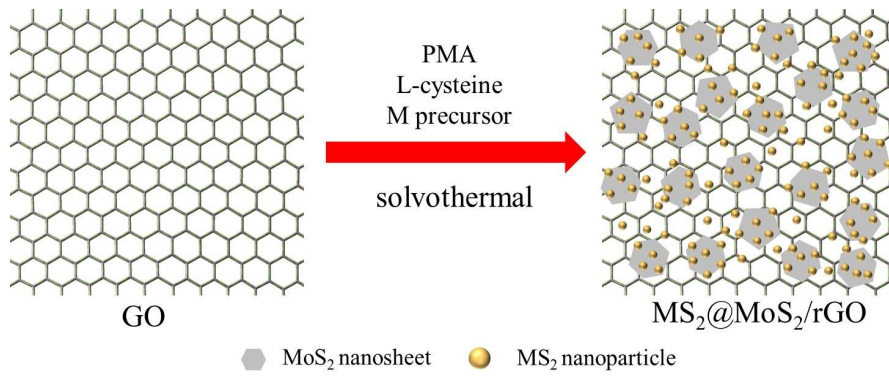

Scheme S1. The fabrication process of the  $MS_2@MoS_2/rGO$  (M = Fe or Ni).

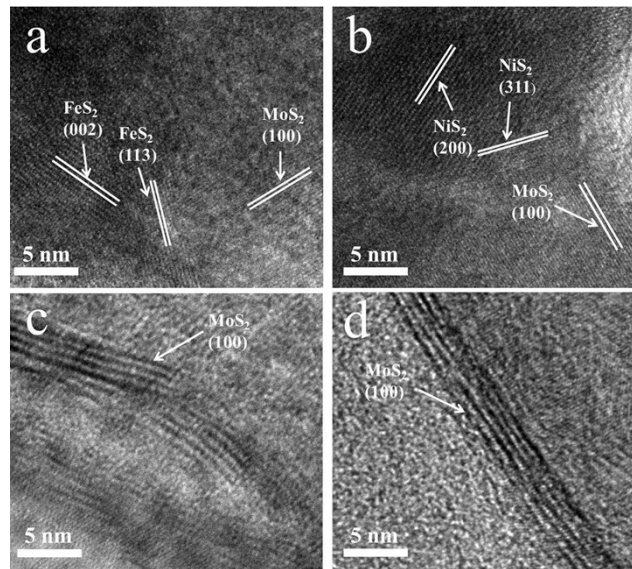

Fig. S1. HRTEM images of (a, c)  $FeS_2@MoS_2/rGO$  and (b, d)  $NiS_2@MoS_2/rGO$ .

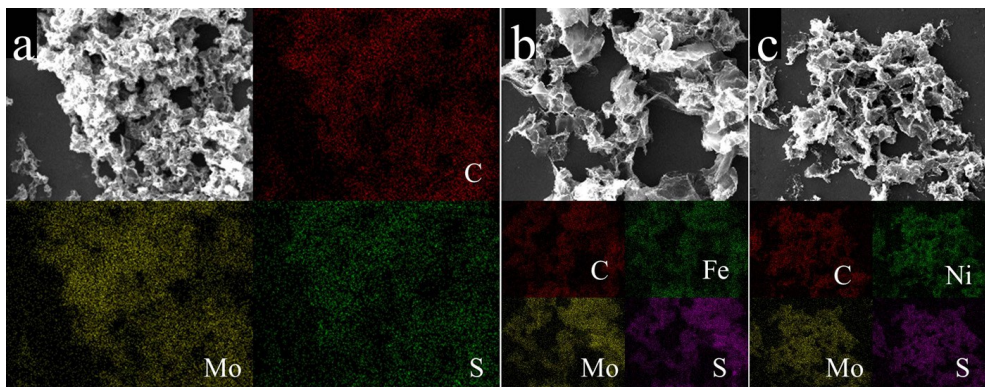

Fig. S2. STEM and EDS mapping images of (a)  $MoS_2/rGO$ , (b)  $FeS_2@MoS_2/rGO$  and (c)  $NiS_2@MoS_2/rGO$ .

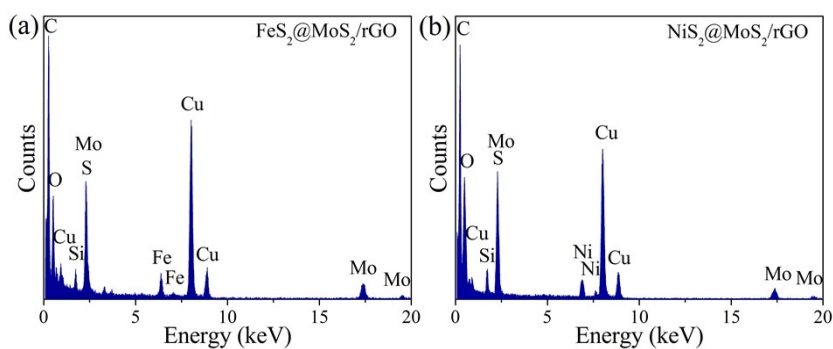

**Fig. S3.** Energy dispersive X-ray (EDX) spectra of (a) FeS<sub>2</sub>@MoS<sub>2</sub>/rGO and (b) NiS<sub>2</sub>@MoS<sub>2</sub>/rGO.

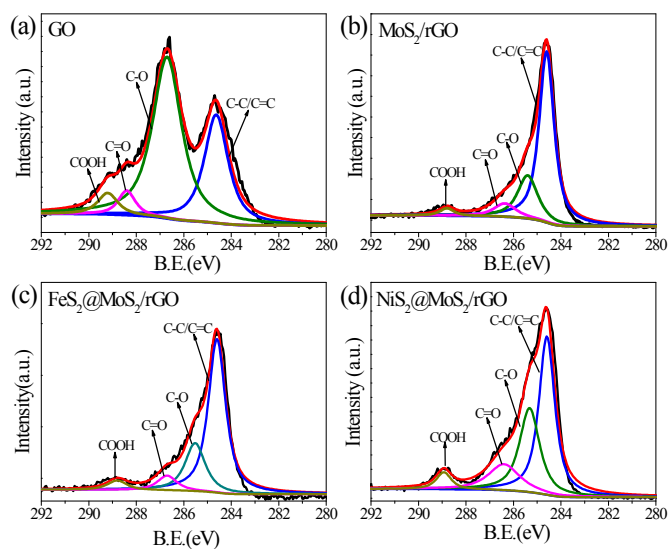

**Fig. S4.** The C 1s XPS spectra of (a) GO, (b) MoS<sub>2</sub>/rGO, (c) FeS<sub>2</sub>@MoS<sub>2</sub>/rGO and (d) NiS<sub>2</sub>@MoS<sub>2</sub>/rGO.

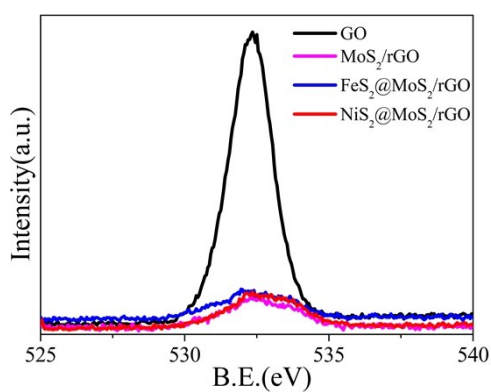

**Fig. S5.** The O 1s XPS spectra of (a) GO, (b) MoS<sub>2</sub>/rGO, (c) FeS<sub>2</sub>@MoS<sub>2</sub>/rGO and (d) NiS<sub>2</sub>@MoS<sub>2</sub>/rGO.

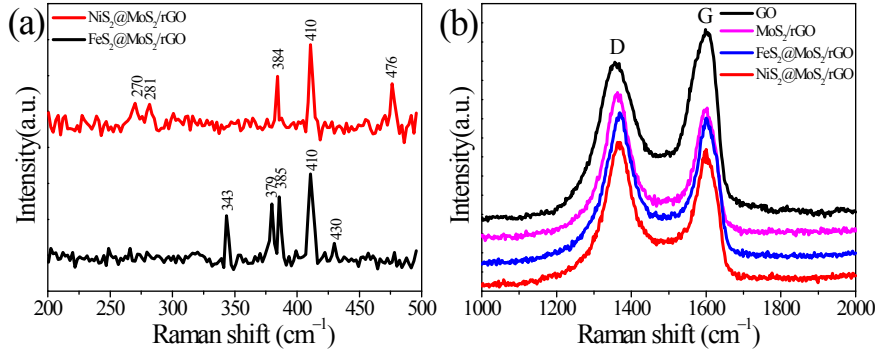

Fig. S6. Raman spectra of FeS<sub>2</sub>@MoS<sub>2</sub>/rGO and NiS<sub>2</sub>@MoS<sub>2</sub>/rGO.

Table S1. Electrochemical parameters of different materials.

| Materials                               | $\eta_{j=10}$ [a] | $\eta_{j=100}$ [b] | b [c] | $j_0$ [d] | $C_{dl}$ [e] | $R_{ct}$ [f] |
|-----------------------------------------|-------------------|--------------------|-------|-----------|--------------|--------------|
| MoS <sub>2</sub>                        | 318               | ---                | 94.1  | 4.1       | 4.8          | 191.3        |
| MoS <sub>2</sub> /rGO                   | 161               | 285                | 52.4  | 11.6      | 10.7         | 1.5          |
| FeS <sub>2</sub> @MoS <sub>2</sub> /rGO | 123               | 224                | 38.4  | 17.5      | 19.0         | 1.3          |
| NiS <sub>2</sub> @MoS <sub>2</sub> /rGO | 110               | 202                | 38.5  | 19.6      | 21.4         | 1.2          |

[a] Overpotential (mV) at current density of 10 mA cm<sup>-2</sup>. [b] Overpotential (mV) at current density of 100 mA cm<sup>-2</sup>. [c] Tafel slope (mV dec<sup>-1</sup>). [d] Exchange current density (μA cm<sup>-2</sup>). [e] Double-layer capacitance (mF cm<sup>-2</sup>). [f] The charge transfer resistances (Ω).

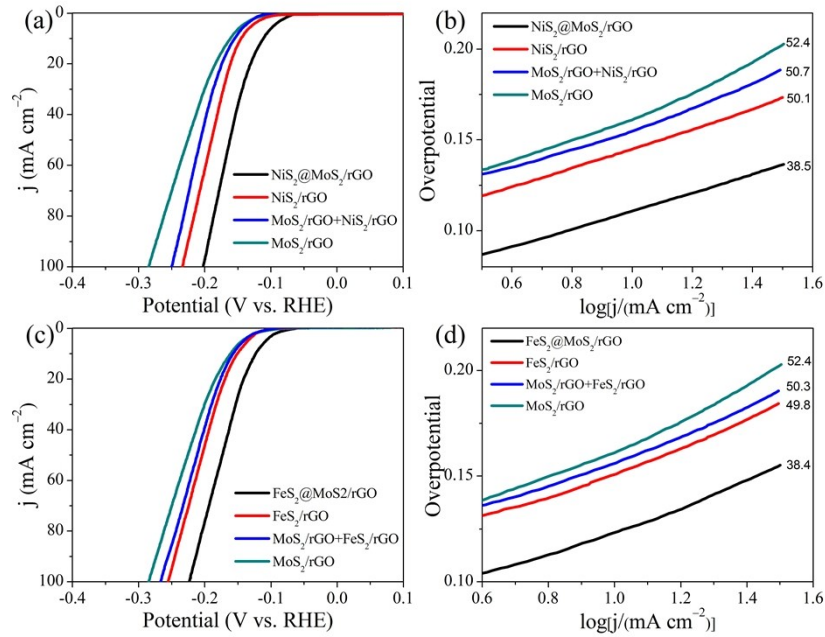

Fig. S7 LSV curves and Tafel plots of MoS<sub>2</sub>/RGO+NiS<sub>2</sub>/RGO (a and b), MoS<sub>2</sub>/RGO+FeS<sub>2</sub>/RGO (c and d).

Table S2. Electrochemical parameters of different catalysts.

| Catalyst                            | Mass loading<br>[mg cm <sup>-2</sup> ] | Tafel slopes<br>[mV dec <sup>-1</sup> ] | $\eta_{j=10}$<br>[mV] | $\eta_{j=100}$<br>[mV] |
|-------------------------------------|----------------------------------------|-----------------------------------------|-----------------------|------------------------|
| MoS <sub>2</sub> ⊥ RGO <sup>4</sup> | 0.204                                  | 43                                      | 172                   | Not given              |
| FeCo@NCNTs-NH <sup>5</sup>          | 0.32                                   | 74                                      | Not given             | Not given              |

|                                                                       |       |      |                                                                |                                      |
|-----------------------------------------------------------------------|-------|------|----------------------------------------------------------------|--------------------------------------|
|                                                                       |       |      | (~280 mV by estimating)                                        |                                      |
| Defect-rich MoS <sub>2</sub> nanosheets <sup>6</sup>                  | 0.285 | 50   | Not given<br>(~190 mV by estimating)                           | Not given                            |
| CoNi@NC <sup>7</sup>                                                  | 0.32  | 104  | 224                                                            | Not given                            |
| MoS <sub>2</sub> /RGO <sup>8</sup>                                    | 0.280 | 41   | Not given<br>(~150 mV by estimating)                           | Not given                            |
| Oxygen-incorporated MoS <sub>2</sub> nanosheets <sup>9</sup>          | 0.285 | 55   | Not given<br>(~180 mV by estimating)                           | Not given<br>(~280 mV by estimating) |
| MoS <sub>2</sub> nanosheets within graphite <sup>10</sup>             | 0.200 | 41   | Not given<br>(~160 mV by estimating)                           | Not given<br>(~280 mV by estimating) |
| Fe <sub>0.9</sub> Co <sub>0.1</sub> S <sub>2</sub> /CNT <sup>11</sup> | 7.0   | 46   | Not given<br>(~120 mV at 20 mA cm <sup>-2</sup> by estimating) | 170                                  |
| NiS <sub>2</sub> @MoS <sub>2</sub> /rGO (current work)                | 0.285 | 38.5 | 110                                                            | 202                                  |
| FeS <sub>2</sub> @MoS <sub>2</sub> /rGO (current work)                | 0.285 | 38.4 | 123                                                            | 224                                  |

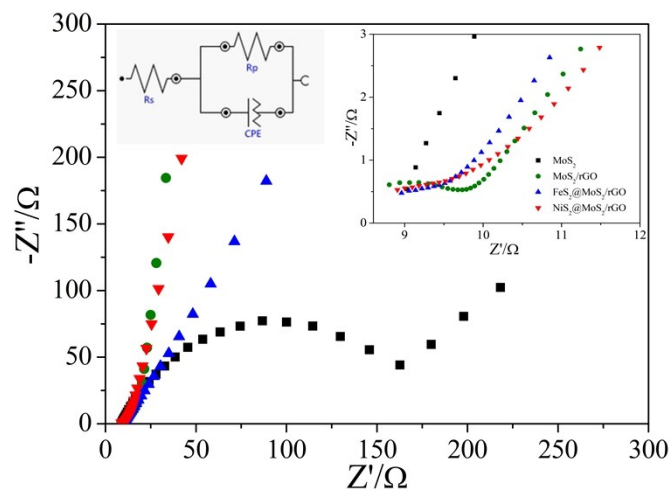

**Fig. S8.** Nyquist plots of different materials in this work (a), the magnified image zoomed from (a).



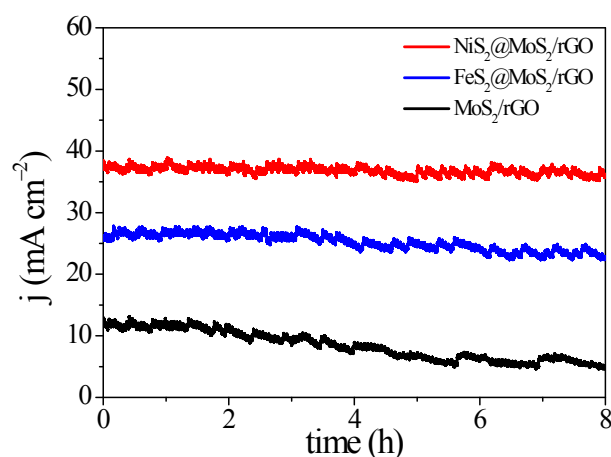

**Fig. S9.** Current versus time during the long term (8 h) with a constant potential ( $-0.15$  V vs. RHE).

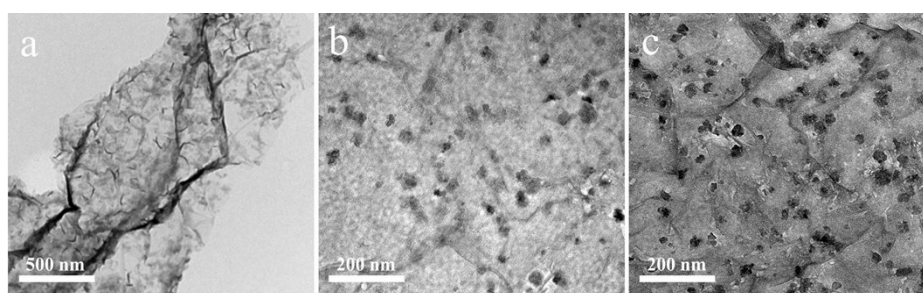

**Fig. S10.** TEM images of (a) MoS<sub>2</sub>/rGO, (b) FeS<sub>2</sub>@MoS<sub>2</sub>/rGO and (c) NiS<sub>2</sub>@MoS<sub>2</sub>/rGO after the stability test (8 h)

## References

1. S. Hou, M. L. Kasner, S. Su, K. Patel and R. Cuellari, *J. Phys. Chem. C*, 2010, **114**, 14915.
2. J. Xie, H. Zhang, S. Li, R. Wang, X. Sun, M. Zhou, J. Zhou, X. W. Lou and Y. Xie, *Adv. Mater.*, 2013, **25**, 5807.
3. Y. Li, H. Wang, L. Xie, Y. Liang, G. Hong and H. Dai, *J. Am. Chem. Soc.*, 2011, **133**, 7296.
4. Z. H. Deng, L. Li, W. Ding, K. Xiong and Z. D. Wei. *Chem. Commun.* 2015, **51**, 1893.
5. J. Deng, P. Ren, D. Deng, L. Yu, F. Yang and X. Bao. *Energy Environ. Sci.* 2014, **7**, 1919.
6. J. Xie, H. Zhang, S. Li, R. Wang, X. Sun, M. Zhou, J. Zhou, X. W. Lou and Y. Xie, *Adv. Mater.* 2013, **25**, 5807.
7. J. Deng, P. Ren, D. Deng and X. Bao, *Angew. Chem. Int. Ed.* 2015, **54**, 2100.
8. Y. Li, H. Wang, L. Xie, Y. Liang, G. Hong and H. Dai, *J. Am. Chem. Soc.* 2011, **133**, 7296.
9. J. Xie, J. Zhang, S. Li, F. Grote, X. Zhang, H. Zhang, R. Wang, Y. Lei, B. Pan and Y. Xie, *J. Am. Chem. Soc.* 2013, **135**, 17881.
10. X. Zheng, J. Xu, K. Yan, H. Wang, Z. Wang and S. Yang, *Chem. Mater.* 2014, **26**, 2344.
11. D.-Y. Wang, M. Gong, H.-L. Chou, C.-J. Pan, H.-A. Chen, Y. Wu, M.-C. Lin, M. Guan, J. Yang, C.-W. Chen, Y.-L. Wang, B.-J. Hwang, C.-C. Chen and H. Dai, *J. Am. Chem. Soc.* 2015, **137**, 1587.
